# Supplementary material for: Pathophysiological and Pharmacological Characteristics of KCNJ5 157-159delITE Somatic Mutation in Aldosterone-Producing Adenomas
Source: MDPI journal article supplement (doi:10.3390/biomedicines9081026), 2021-08-17
Supplement: s1 [file s1]

**Supplementary Table S1.** Baseline characteristics of the APA patient harboring *KCNJ5* 157-159delITE mutation

| Variables                     | Before adrenalectomy | 12 months after adrenalectomy |
|-------------------------------|----------------------|-------------------------------|
| Age (years)                   | 47                   | n/a                           |
| Sex                           | Female               | n/a                           |
| Body weight (kg)              | 47                   | n/a                           |
| BMI (kg/m <sup>2</sup> )      | 20.34                | n/a                           |
| CT mass size (cm)             | 1.2                  | n/a                           |
| Hypertension duration (years) | 3                    | n/a                           |
| SBP (mm Hg)                   | 160                  | 128                           |
| DBP (mm Hg)                   | 100                  | 87                            |
| Aldosterone level (ng/dL) †   | 92.1                 | 24.7                          |
| PRA (ng/mL/hr) †              | 0.01                 | 1.73                          |
| ARR (ng/dL per ng/ml/hr)      | 9210                 | 14.278                        |
| K (mEq/L) †                   | 3.5                  | 4.9                           |
| Clinical success              | n/a                  | Complete success              |
| Biochemical success           | n/a                  | Complete success              |

Abbreviations: ARR, aldosterone renin ratio; BMI, body mass index; CT, computer tomography; DBP, diastolic blood pressure; K, potassium; PRA, plasma renin activity; SBP, systolic blood pressure; n/a, not applicable

† All anti-hypertensive medications that will interfere the RAAS were discontinued before PA confirmation tests.

### **Standard TAIPI protocol and Aldosteronism Consensus in Taiwan**

#### **Patients were enrolled from the following hospitals:**

This study included two medical centers (National Taiwan University Hospital (NTUH), Taipei, Taiwan; Taipei University Hospital, Taipei, Taiwan) and five regional hospitals (Cardinal Tien Hospital, New Taipei City, Taiwan; Taipei Tzu Chi Hospital, New Taipei City, Taiwan; Yun- Lin Branch of NTUH, Douliou City, Taiwan; Hsin-Chu Branch of NTUH, Hsin-Chu City, Taiwan; Zhongxing Branch of Taipei City Hospital, Taipei, Taiwan)[1].

### **Material and methods**

#### **Adrenalectomy**

Adrenalectomy was performed via lateral transperitoneal laparoscopic approach by experienced surgeons. Adrenal tumors removed via the surgery were fresh-frozen and stored at  $-80^{\circ}\text{C}$  until further examination.

**Our standard protocol to identify primary aldosteronism (PA) and functional lateralization:**

The diagnosis of primary aldosteronism was established in hypertensive patients on the basis of the following criteria [1,2]:

**Confirmation**

Fulfillment of the following three conditions confirmed a diagnosis of PA:

(1) autonomous excess aldosterone production evidenced with an aldosterone-renin ratio (ARR)  $> 35$ ; (2) a TAIPAI score larger than 60%; (3) post-saline loading PAC  $> 16 \text{ ng/dL}$ , or PAC/PRA  $> 35 \text{ (ng/dL)/(ng/mL/h)}$  shown in a post-capotopril/losartan test. (Abbreviations: PAC, plasma aldosterone concentration; PRA, plasma renin activity) [1].

The probability of PA (TAIPAI score) was equal to:

$$= 1 + e^{-\beta} ; \text{ where } \beta = (\text{PAC [ng/dl]} \times [0.063]) + \text{PRA [ng/ml/h]} \times [-0.205] + ([\text{ARR} \times 0.001] \text{ BMI [kg/m}^2] \times [0.067]) + (\text{Male} \times [-0.738] + \text{SK [mmol/l]} \times [-1.512]) + (\text{eGFR [ml/min/1.73 m}^2] \times [0.017]) + ([\text{propensity score}] \times [-0.539] + [1.851])$$

**Outcome measurements**

Patients were evaluated monthly for the first 3 months postoperatively and every 3 months thereafter. The Primary Aldosteronism Surgery Outcome (PASO) consensus on clinical and biochemical outcomes was applied (Supplementary table 1). [3] PA patients treated with MRA were monitored every 3 months.

**Supplementary Figure S1** The superimpose of the wild-type KCNJ5 and KCNJ5 carrying L168R mutation. The mutation of L168 to R168 will strongly change the original helix conformation to become a more flexible loop conformation.

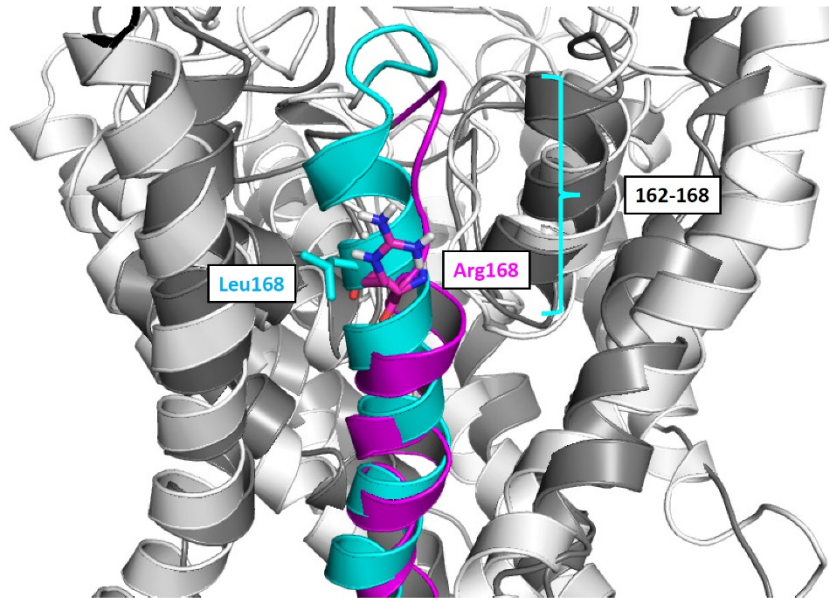

**Supplementary Figure S2** The computer modeling analysis for KCNJ5 and Roxithromycin. The Roxithromycin (cyan) dock into the KCNJ5 (purple) binding sites and include a 30 Å thickness cell membrane (yellow) for 1 ns MD equilibrium. The structure showed that the roxithromycin could docking near the pore of selectivity filter of KCNJ5.

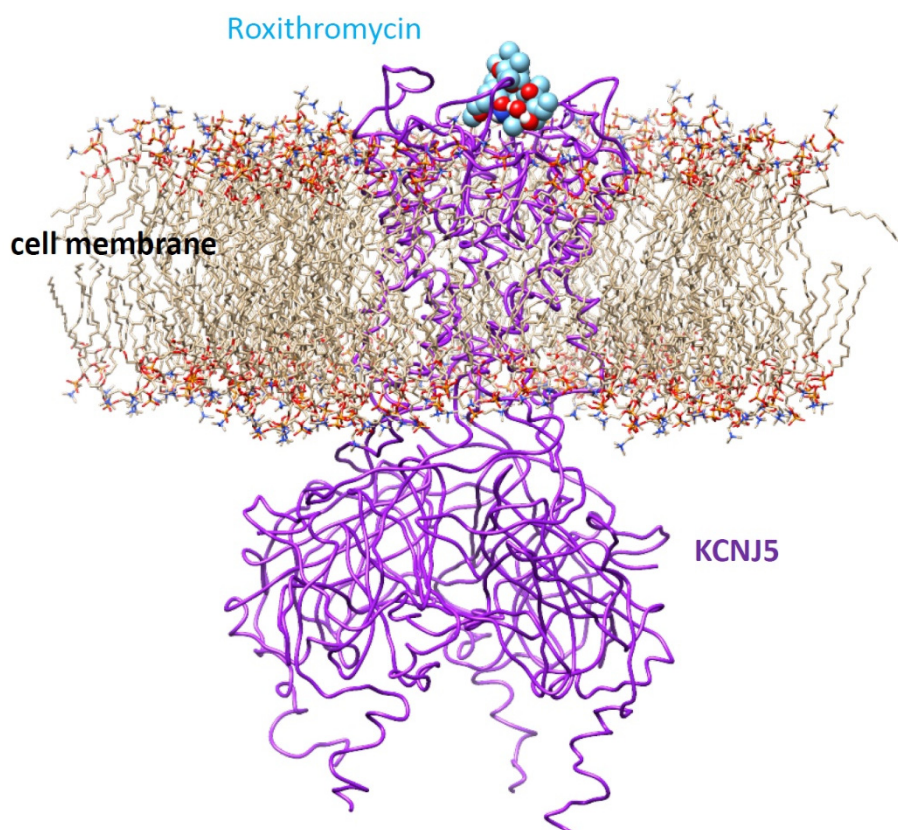

## Reference

1. Wu, V.C.; Hu, Y.H.; Er, L.K.; Yen, R.F.; Chang, C.H.; Chang, Y.L.; Lu, C.C.; Chang, C.C.; Lin, J.H.; Lin, Y.H.; et al. Case detection and diagnosis of primary aldosteronism - The consensus of Taiwan Society of Aldosteronism. *J Formos Med Assoc* **2017**, *116*, 993-1005, doi:10.1016/j.jfma.2017.06.004.
2. Wu, V.C.; Huang, K.H.; Peng, K.Y.; Tsai, Y.C.; Wu, C.H.; Wang, S.M.; Yang, S.Y.; Lin, L.Y.; Chang, C.C.; Lin, Y.H.; et al. Prevalence and clinical correlates of somatic mutation in aldosterone producing adenoma-Taiwanese population. *Sci Rep* **2015**, *5*, 11396, doi:10.1038/srep11396.
3. Williams, T.A.; Lenders, J.W.M.; Mulatero, P.; Burrello, J.; Rottenkolber, M.; Adolf, C.; Satoh, F.; Amar, L.; Quinkler, M.; Deinum, J.; et al. Outcomes after

adrenalectomy for unilateral primary aldosteronism: an international consensus on outcome measures and analysis of remission rates in an international cohort. *Lancet Diabetes Endocrinol* **2017**, 5, 689-699, doi:10.1016/S2213-8587(17)30135-3.
